# Supplementary material for: Iron oxide nanoparticle layer templated by polydopamine spheres: a novel scaffold toward hollow–mesoporous magnetic nanoreactors
Source: Royal Society of Chemistry journal article supplement (doi:10.1039/c4nr05931j), 2014-11-19
Supplement: c4nr05931j1.pdf [file c4nr05931j1.pdf]

## Supporting Information

### Iron Oxide Nanoparticle Layer Templated by Polydopamine Spheres: A Novel Scaffold toward Hollow-Mesoporous Magnetic Nanoreactors

Liang Huang,<sup>§a</sup> Lijiao Ao,<sup>§a</sup> Xiaobin Xie,<sup>a</sup> Guanhui Gao,<sup>a</sup> Mohamed F. Foda<sup>b</sup> and Wu Su<sup>\*a</sup>

<sup>a</sup>Guangdong Key Laboratory of Nanomedicine, Institute of Biomedicine and Biotechnology, Shenzhen Institutes of Advanced Technology, Chinese Academy of Sciences, Shenzhen 518055, P. R. China

<sup>b</sup>College of Science, Huazhong Agricultural University, Wuhan 430070, P. R. China

§ Equal contribution

\*Corresponding author: wu.su@siat.ac.cn

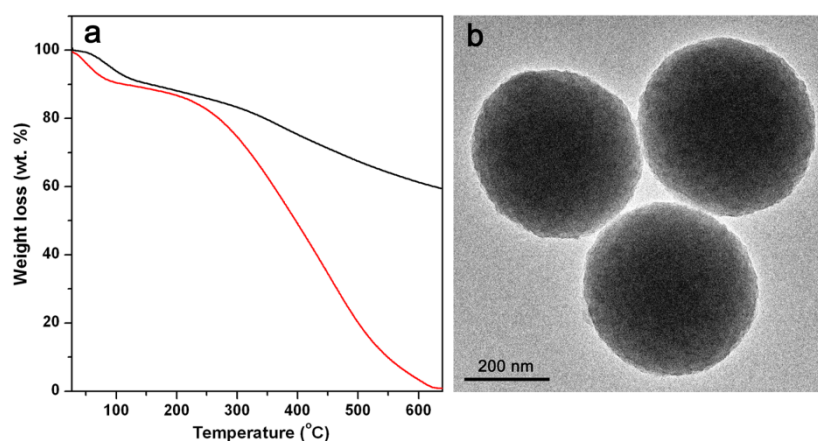

**Fig. S1** (a) TGA curves of PDA spheres under nitrogen (black) and air (red) atmospheres. (b) TEM image of PDA spheres after refluxed for 3 h in TEG (290 °C under nitrogen).

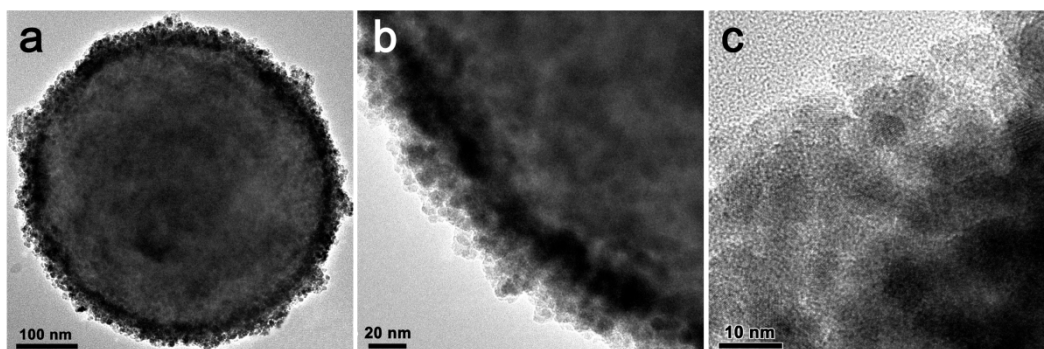

**Fig. S2** TEM (a,b) and HRTEM (c) images of PDA@Fe<sub>3</sub>O<sub>4</sub> composite spheres with a 50 nm thick Fe<sub>3</sub>O<sub>4</sub> nanoparticle layer.

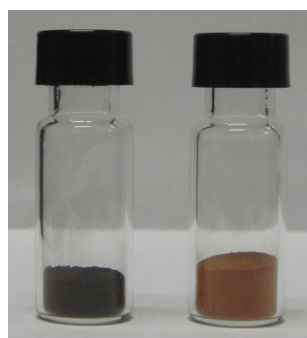

**Fig. S3** Photographs of PDA@Fe<sub>3</sub>O<sub>4</sub>@SiO<sub>2</sub> (left) and the derivative Fe<sub>2</sub>O<sub>3</sub>@SiO<sub>2</sub> (right) composite spheres after calcination at 600 °C in air.

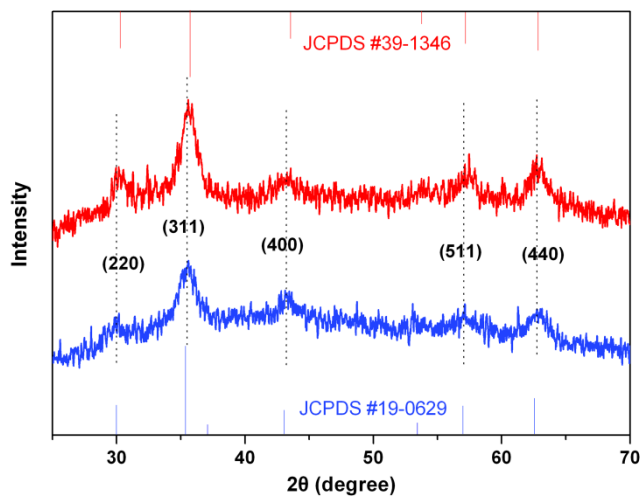

**Fig. S4** XRD patterns of PDA@Fe<sub>3</sub>O<sub>4</sub>@SiO<sub>2</sub> (blue) and Fe<sub>2</sub>O<sub>3</sub>@SiO<sub>2</sub> (red) composite spheres. The blue and red vertical lines stand for the (220), (311), (400), (511) and (440) diffraction peaks of cubic Fe<sub>3</sub>O<sub>4</sub> (JCPDS 19-0629) and cubic  $\gamma$ -Fe<sub>2</sub>O<sub>3</sub> (JCPDS 39-1346), respectively.

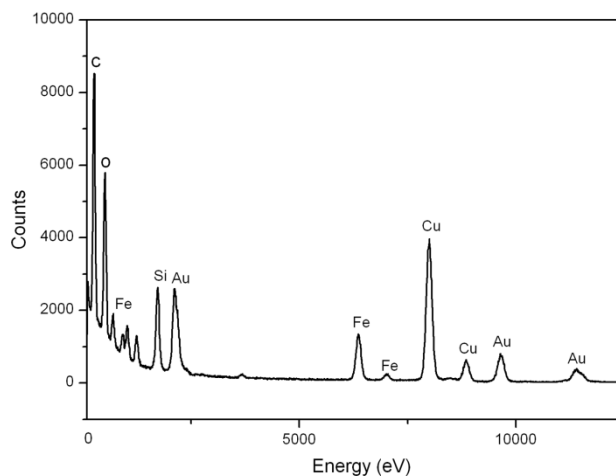

**Fig. S5** EDX spectrum of Fe<sub>2</sub>O<sub>3</sub>@Au@SiO<sub>2</sub> composite spheres.
